# Supplementary material
Source: publisher figshare collection journal article supplement (https://acs.figshare.com/ndownloader/files/28175603)
Supplement: Supplementary file 1 [file 28175603]

# **SUPPORTING INFORMATION**

## **Microbial contamination of drinking water supplied by private wells after Hurricane Harvey**

Kelsey J. Pieper,<sup>1\*</sup> C. Nathan Jones,<sup>2</sup> William J. Rhoads,<sup>3\*</sup> McNamara Rome,<sup>1</sup> Drew M. Gholson,<sup>4</sup> Adrienne Katner,<sup>5</sup> Diane E. Boellstorff,<sup>6</sup> R. Edward Beighley<sup>1</sup>

<sup>1</sup>Department of Civil and Environmental Engineering, Northeastern University, Boston, MA, 02115

<sup>2</sup>Department of Biological Sciences, University of Alabama, Tuscaloosa, AL, 35401

<sup>3</sup>Department of Environmental Microbiology, Eawag—Swiss Federal Institute of Aquatic Science and Technology, Dübendorf, Switzerland

<sup>4</sup>National Center for Alluvial Aquifer Research, Mississippi State University, Stoneville, MS, 38776

<sup>5</sup>Department of Environmental and Occupational Health Sciences, Louisiana State University Health Science Center, New Orleans, LA, USA

<sup>6</sup>Texas A&M AgriLife Extension Service, Department of Soil and Crop Sciences, Texas A&M University System, College Station, TX 77843

\*Corresponding Author: K. Pieper – k.pieper@northeastern.edu, 400 Snell Hall, Northeastern University, 360 Huntington Avenue, Boston, MA 02115; W. Rhoads – Email: william.rhoads@eawag.ch; Address: Swiss Federal Institute of Aquatic Science and Technology, Dübendorf, Switzerland.

### **DESCRIPTION OF SUPPORTING INFORMATION**

Section S1. Sampling instructions from the University campaign

Section S2. University Round 1 survey

Section S3. University Round 2 survey

Section S4. Characteristics of participations in University Round 1 testing campaign

Table Section S4-1. Coliform occurrence rate in counties with >10 samples

Table Section S4-2. Summary statistics of water quality parameters

Table S1. Survey variables used in logistic regression

Table S2. Water quality variables used in logistic regression

Table S3. Peak flooding dates derived from the US Geological Survey stream gage data

Table S4. Private well information in the 41 disaster declared counties

Table S5. Comparison of sampling rates by the three campaigns

Table S6. County-level private well testing results in the 41 disaster declared counties from the three campaigns

Table S7. Zip-code level private well testing results in the 41 disaster declared counties from the three campaigns

Table S8. TC and EC screening data collected through TWON programming in Texas Gulf Coast counties

Table S9. Linear regression model outputs

Table S10. Distribution of coliform contamination by weeks since peak flooding among participants in University testing

Table S11. Odds ratio results from logistic regressions

Table S12. Well disinfection rates based on inundation proximity

Figure S1. Spatial extent of flood impact on well users and associated contamination rates by zip code

Figure S2. Cumulative distribution plot of total coliform and *E. coli* in Round 1

Figure S3. Cumulative distribution plot of total coliform and *E. coli* in Round 1 by rural and urban counties

Figure S4. Total coliform and *E. coli* levels in chlorinated and non-chlorinated well water

Figure S5. Number of samples and microbial contamination rates by weeks since peak flooding for Rounds 1 and 2 of the University testing through 28 weeks

## **Section S1. Sampling instructions from the University campaign**

### **Collection Day and Sample Drop-off (Same Day)**

1. Turn on the cold water only at the highest flow rate fixture (e.g., bathtub, wellhead tap) and flush for 5 minutes.
2. After 5 minutes, turn off the water.
3. Go to your kitchen tap. If your kitchen tap is not working, go to an outdoor tap.
4. Unpack the sample bottle from the plastic bag. Remove the cap from the bottle. Set the cap on the counter upside down, trying not to touch the inside of the cap or bottle.
5. Open the cold water tap and run the water for one minute.
6. At one minute, fill the bottle completely at full flow (as if you were filling a glass of water). Do not rinse the powder out of the container. Put the cap back on the bottle.
7. Turn off the water.
8. Complete the contact information and sampling form.
9. Place bottle and form back into the plastic bag. Bring your sample bag to the County Extension Office list on your sampling bag.

## Section S2. University Round 1 survey

1. Where was your water sample collected? ☐ Kitchen tap ☐ Bathroom tap ☐ Bath tub/shower tap  
☐ Outside spigot ☐ Wellhead ☐ Other (please describe): \_\_\_\_\_
2. Is your well system currently working (you have running water in the home)?  
☐ Yes ☐ No ☐ Don't know
3. Have you used your well water since Hurricane Harvey?  
☐ Yes ☐ No ☐ Don't know  
**If YES**, roughly how many days have you been using your water? \_\_\_\_\_
4. How did you hear about this free testing opportunity?  
☐ Email ☐ Radio announcement ☐ Info on FEMA site  
☐ Television announcement ☐ Texas A&M website ☐ Family/neighbor  
☐ Other (please describe): \_\_\_\_\_

### WELL SYSTEM INFORMATION

5. Please describe the following to the best of your knowledge:
  - a. Type of private well: ☐ dug or bored well ☐ drilled well ☐ Don't know
  - b. What is the depth of the well? \_\_\_\_\_ feet ☐ Don't know
  - c. What year was well constructed? \_\_\_\_\_ ☐ Don't know
  - d. How many people in your home? \_\_\_\_\_ ☐ Don't know
  - e. How many homes are supplied? \_\_\_\_\_ ☐ Don't know
6. How long have you lived at your current residence? ☐ <1 year ☐ 3-5 years ☐ 10-15 years  
☐ 1-2 years ☐ 6-10 years ☐ 20 or more years
7. Does anyone in your home drink the water from your kitchen tap?  
☐ yes with filter/treatment ☐ yes but not with filter/treatment ☐ no
8. Do you have a septic system? ☐ Yes ☐ No ☐ Don't know  
**If YES**, how often do you have your septic tank emptied? ☐ Haven't yet ☐ <1 year ☐ 1-2 years  
☐ 3-5 years ☐ 6-10 years ☐ 10 or more years ☐ When problem
9. What water treatment devices are currently installed? **Check all that apply:**  
☐ None ☐ Iron removal ☐ Chlorinator  
☐ Sediment filter ☐ Acid neutralizer ☐ Water softener  
☐ Reverse osmosis ☐ Ultraviolet (UV) light  
☐ Activated carbon (charcoal) filter ☐ Other (please describe): \_\_\_\_\_  
**If you have treatment, is it:** ☐ tap-mounted unit ☐ whole house filter ☐ mixture ☐ NA

### FLOODING DURING HURRICANE HARVEY

10. Was there standing water in your home during Harvey? ☐ Yes ☐ No ☐ Don't know  
**If YES**, how high did it get at its highest?  
☐ Inches ☐ Ankle deep ☐ Knee deep ☐ Waist deep ☐ Above my head ☐ Don't know
11. Was your wellhead submerged under floodwater during Harvey? ☐ Yes ☐ No ☐ Don't know

12. Was your well system damaged during Harvey? ☐ Yes ☐ No ☐ Don't know

**If YES**, what was damaged? **Check all that apply:**

- ☐ Pipes broken in home ☐ Electrical problems with pump ☐ Pump clogged with debris  
☐ Cover gone ☐ Cracks or damage to casing ☐ Other (please describe): \_\_\_\_\_

13. Was your septic system damaged during Harvey? ☐ Yes ☐ No ☐ Don't know ☐ Don't have septic

**If YES**, what was damaged? **Check all that apply:**

- ☐ Septic tank filled with floodwater ☐ Cover gone ☐ Drain field saturated  
☐ Other (please describe): \_\_\_\_\_

14. Please indicate your level of agreement by circling the appropriate number (**1 = disagree; 5 = agree**).

| AFTER THE FLOOD                               |   |         |   |       |
|-----------------------------------------------|---|---------|---|-------|
| Disagree                                      |   | Neutral |   | Agree |
| I feel my well water was safe to drink        |   |         |   |       |
| 1                                             | 2 | 3       | 4 | 5     |
| I feel my well water was safe for cooking     |   |         |   |       |
| 1                                             | 2 | 3       | 4 | 5     |
| I feel that my well water is safe for bathing |   |         |   |       |
| 1                                             | 2 | 3       | 4 | 5     |

#### WELL WATER TESTING AND WELL MAINTENANCE

15. Have you ever had your well system shock chlorinated? ☐ Yes ☐ No ☐ Don't know

**If YES**, when was the last time? \_\_\_\_\_

**If NO**, why not? **Check all that apply:**

- ☐ Too expensive ☐ Don't drink or cook with well water ☐ Not a priority  
☐ Not a concern ☐ Don't know how to shock chlorinate ☐ Meant to but didn't  
☐ Not sure of benefit ☐ Other (please describe): \_\_\_\_\_

16. Have you ever tested your well water? ☐ No ☐ Yes ☐ Don't know

**If YES**, was it with Texas A&M AgriLife Extension? ☐ No ☐ Yes ☐ Don't know

**If NO, or you do not test as often as you would like**, why not? **Check all that apply:**

- ☐ Too expensive ☐ Don't drink or cook with it ☐ Not a priority or concern  
☐ No Transportation ☐ Don't know where to get it tested ☐ Other: \_\_\_\_\_

#### KNOWLEDGE, RESOURCES, INFORMATION AND BEHAVIOR

17. Please indicate your level of agreement by circling the appropriate number (**1 = disagree; 5 = agree**).

| Disagree                                                                                       |   | Neutral |   | Agree |
|------------------------------------------------------------------------------------------------|---|---------|---|-------|
| I am comfortable managing my well (testing, treating, and maintaining)                         |   |         |   |       |
| 1                                                                                              | 2 | 3       | 4 | 5     |
| I know where to find information about my well characteristics (e.g., depth, year constructed) |   |         |   |       |
| 1                                                                                              | 2 | 3       | 4 | 5     |
| I know where to find information about well water testing services                             |   |         |   |       |
| 1                                                                                              | 2 | 3       | 4 | 5     |
| I know where to find information about well water treatment systems                            |   |         |   |       |
| 1                                                                                              | 2 | 3       | 4 | 5     |

**FAMILY**

18. What is your annual household income?

- |                                              |                                               |                                                 |
|----------------------------------------------|-----------------------------------------------|-------------------------------------------------|
| <input type="checkbox"/> \$12,000 or below   | <input type="checkbox"/> \$45,001 – \$65,000  | <input type="checkbox"/> \$100,001 or \$150,000 |
| <input type="checkbox"/> \$12,001 – \$24,000 | <input type="checkbox"/> \$65,001 – \$85,000  | <input type="checkbox"/> \$150,001 or above     |
| <input type="checkbox"/> \$24,001 – \$45,000 | <input type="checkbox"/> \$85,001 – \$100,000 | <input type="checkbox"/> Prefer not to answer   |

19. How would you describe the persons within your household? **Check all that apply.**

- |                                                           |                                             |                                               |
|-----------------------------------------------------------|---------------------------------------------|-----------------------------------------------|
| <input type="checkbox"/> American Indian or Alaska Native | <input type="checkbox"/> Hispanic or Latino | <input type="checkbox"/> White or Caucasian   |
| <input type="checkbox"/> Asian                            | <input type="checkbox"/> Pacific Islander   | <input type="checkbox"/> Prefer not to answer |
| <input type="checkbox"/> Black or African American        | <input type="checkbox"/> Two or more races  |                                               |

20. What is the highest level of education in the house?

- |                                               |                                           |                                                 |
|-----------------------------------------------|-------------------------------------------|-------------------------------------------------|
| <input type="checkbox"/> Some high school     | <input type="checkbox"/> Some college     | <input type="checkbox"/> Post college (MS, PhD) |
| <input type="checkbox"/> High school graduate | <input type="checkbox"/> College graduate | <input type="checkbox"/> Prefer not to answer   |

### Section S3. University Round 2 survey

1. Where was your water sample collected? ☐ Kitchen tap ☐ Bathroom tap ☐ Bath tub/shower tap  
☐ Outside spigot ☐ Wellhead ☐ Other (please describe): \_\_\_\_\_
2. Have you used your well water since Hurricane Harvey? ☐ Yes ☐ No ☐ Don't know  
**If YES**, roughly how many days have you been using your water? \_\_\_\_\_ or ☐ Never stopped
3. Was your well system damaged during Harvey? ☐ Yes ☐ No ☐ Don't know
4. Was your well head submerged under floodwater during Harvey? ☐ Yes ☐ No ☐ Don't know
5. Was your septic system damaged during Harvey? ☐ Yes ☐ No ☐ Don't know  
☐ Don't have septic system
6. Was your well disinfected (shock chlorinated) after Harvey? ☐ Yes, did it ourselves ☐ No  
☐ Yes, hired someone ☐ Don't know  
**If YES**, roughly how many days ago? \_\_\_\_\_  
roughly how much bleach was used? \_\_\_\_\_  
how many times have you disinfected your well? \_\_\_\_\_
7. What type of well do you have? ☐ Dug or bored well ☐ Drilled well ☐ Don't know/unsure
8. What is the well's depth, if known? \_\_\_\_\_ or ☐ Don't know
9. What year was the well constructed, if known? \_\_\_\_\_ or ☐ Don't know
10. Do you have water treatment installed? (*fill in all that apply*) ☐ Tap-mounted unit  
☐ Unit within the frig  
☐ Whole house filter  
☐ I don't have treatment

## Section S4. Characteristics of participations in University Round 1 testing campaign

As before most sampling (68.1%; n=410) was conducted in the first month of recovery. The median levels were 80.6 and 0.0 MPN for TC and EC (13.2 and 4.1 MPN among samples with detectable levels). Four wells had TC levels too numerous to count (TNCT; >2419.6 MPN) and one well had both TC and EC levels TNTC (Figure S2). Of the counties with equal to or more than 10 samples (10 to 171; n=10 counties; Table Section S4-1), TC rates varied from 20.0%-62.5% (median of 46.3%) and EC varied from 0.0%-19.2% (median of 10.3%). There was little (0.0-3.4%) exceedance of USEPA health-based drinking water standards (other than coliform bacteria; Table Section S4-2). However, water samples were collected after flushing, so contamination associated with the interior plumbing was not evaluated. Some water samples had iron and manganese above the USEPA aesthetic-based standards.

Most water samples were collected at the kitchen or bathroom (68.6%; n=413), with several collected from an outdoor spigot (e.g., wellhead tap; 25.7%) or non-drinking indoor water tap (2.2%). Treatment was installed in the majority of houses (51.2%, n=297), and when present, it was most commonly a water softener (43.8%) or sediment filter (25.6%). Residents rarely had treatment devices that treated for microbial contamination – 28 had a reverse osmosis unit (9.4%), 12 had continuous chlorinators (4.0%), and 1 had UV light (0.3%).

More participants reported being supplied by a drilled well (79.1%; n=476), and most wells were reported to be great than 100 ft. in depth (58.8%; n=330). Roughly 70% of systems supplied 2-4 people and 80.0% of participants had been living at the residence for at least five years. Among participants that responded (n=431), 40.8% reported a household income less than \$65,000 (Texas median income is \$59,570), with 14.2% reporting an income less than \$24,000 (Texas poverty level for one person is \$24,238). Approximately half (48.3%) of responding participants (n=549) reported having a college degree or higher. Responding participants (n=545) were predominately “White or Caucasian” (86.1%), with 6.4% self-identified as “Hispanic or Latino” and 5.7% as “Two or more races”.

Table Section S4-1. Coliform occurrence rate in counties with >10 samples

| County    | N   | Occurrence rate |       |
|-----------|-----|-----------------|-------|
|           |     | TC              | EC    |
| Chambers  | 18  | 27.8%           | 5.6%  |
| Hardin    | 76  | 32.9%           | 10.5% |
| Harris    | 52  | 57.7%           | 19.2% |
| Liberty   | 40  | 60.0%           | 15.0% |
| Matagorda | 10  | 20.0%           | 10.0% |
| Orange    | 40  | 55.0%           | 15.0% |
| Refugio   | 24  | 62.5%           | 4.2%  |
| Victoria  | 102 | 44.1%           | 3.9%  |
| Waller    | 27  | 25.9%           | 0.0%  |
| Wharton   | 171 | 48.5%           | 18.1% |



Table Section S4-2. Summary statistics of water quality parameters

| Target water quality constituent | Standard     |            | Number of observations | MRL  | % <MRL | Mean   | Median | 90 <sup>th</sup> Percentile | Percent Exceeding |
|----------------------------------|--------------|------------|------------------------|------|--------|--------|--------|-----------------------------|-------------------|
| Arsenic, in µg/L                 | MCL          | 10 µg/L    | 413                    | 0.5  | 19%    | 2.8    | 1.6    | 6.1                         | 3.4%              |
| Cadmium, in µg/L                 |              | 5 µg/L     | 413                    | 1.0  | 99%    | 0.5    | 0.5    | 0.5                         | 0.2%              |
| Chromium, in µg/L                |              | 100 µg/L   | 413                    | 1.0  | 61%    | 8.6    | 0.5    | 5.4                         | 1.0%              |
| Fluoride, in mg/L                |              | 4.0 mg/L   | 326                    | 0.01 | 13%    | 0.36   | 0.29   | 0.59                        | 0.0%              |
| Nitrate, in mg/L                 |              | 10 mg/L    | 326                    | 0.01 | 29%    | 0.69   | 0.11   | 1.32                        | 1.2%              |
| Uranium, in µg/L                 |              | 30 µg/L    | 413                    | 1.0  | 63%    | 2.1    | 0.5    | 3.9                         | 0.7%              |
| Total coliform, in cfu           |              | ABSENT     | 602                    | 0    | 54%    | 80.6   | 0.0    | 172.0                       | 46.0%             |
| <i>E. coli</i> , in cfu          |              | ABSENT     | 602                    | 0    | 88%    | 8.2    | 0.0    | 1.0                         | 11.8%             |
| Copper, in µg/L                  | Action Level | 1,300 µg/L | 413                    | 1.0  | 19%    | 34.2   | 5.9    | 58.7                        | 0.2%              |
| Lead, in µg/L                    |              | 15 µg/L    | 413                    | 1.0  | 74%    | 3.6    | 0.5    | 4.2                         | 3.6%              |
| Chloride, in mg/L                | SMCL         | 250 mg/L   | 326                    | 0.01 | 0.3%   | 100.59 | 57.84  | 240.42                      | 9.5%              |
| Copper, in µg/L                  |              | 1,000 µg/L | 413                    | 1.0  | 19%    | 34.2   | 5.9    | 58.7                        | 0.5%              |
| Fluoride, in mg/L                |              | 2.0 mg/L   | 326                    | 10.0 | 13%    | 0.4    | 0.3    | 0.6                         | 0.6%              |
| Iron, in µg/L                    |              | 300 µg/L   | 413                    | 1.0  | 30%    | 343.1  | 46.8   | 768.3                       | 22.0%             |
| Manganese, in µg/L               |              | 50 µg/L    | 413                    | 1.0  | 32%    | 42.0   | 7.3    | 109.6                       | 22.5%             |
| Sulfate, in mg/L                 |              | 250 mg/L   | 326                    | 0.01 | 6%     | 16.35  | 5.58   | 45.03                       | 0.0%              |
| Zinc, in µg/L                    |              | 5,000 µg/L | 413                    | 5.0  | 20%    | 171.8  | 27.5   | 268.7                       | 0.5%              |

MCL: Maximum Contaminant Levels – associated with risk to human health

SMCL: Secondary Maximum Contaminant Levels – associated with aesthetic considerations

MRL: Minimum reporting level

cfu: colony forming units

Table S1. Survey variables used in logistic regression

| Variable                                    | n   | Type     | Levels                                                     | Range | p-value |      |
|---------------------------------------------|-----|----------|------------------------------------------------------------|-------|---------|------|
|                                             |     |          |                                                            |       | TC      | EC   |
| Survey Data Model                           |     |          |                                                            |       |         |      |
| County                                      | 582 | Nominal  | Name of county                                             | -     | 0.99    | 1.00 |
| # weeks used                                | 596 | Interval | Number of weeks                                            | 0-10  | 0.05    | 0.00 |
| Flood Pixel 100m                            | 587 | Nominal  | Yes; No                                                    | -     | 0.03    | 0.00 |
| Flood Pixel 250m                            | 587 | Nominal  | Yes; No                                                    | -     | 0.07    | 0.01 |
| Flood Pixel 500m                            | 587 | Nominal  | Yes; No                                                    | -     | 0.28    | 0.37 |
| Flood Pixel 1000m                           | 587 | Nominal  | Yes; No                                                    | -     | 0.23    | 0.63 |
| CDC Code                                    | 583 | Nominal  | Urban; Rural                                               | -     | 0.48    | 0.04 |
| Q1. Sampling Location                       | 581 | Nominal  | Drinking; Non-drinking                                     | -     | 0.41    | 0.16 |
| Q2. System working                          | 594 | Nominal  | Yes; No; Don't Know                                        | -     | 0.24    | 0.48 |
| Q6A-well_type                               | 494 | Nominal  | Drilled; Dug/Bored; Don't know                             | -     | 0.87    | 0.51 |
| Q6B. Well depth                             | 413 | Nominal  | Shallow; Deep                                              | -     | 0.68    | 0.26 |
| Q6C. Well year                              | 417 | Nominal  | PreReg; PostReg                                            | -     | 0.49    | 0.37 |
| Q6D. # people on well                       | 570 | Nominal  | Number of people; Don't know                               | 0-11  | 0.99    | 1.00 |
| Q6E. # homes on well                        | 565 | Nominal  | Number of homes; Don't know                                | 0-21  | 0.19    | 0.99 |
| Q7. # years at residence                    | 586 | Interval | <1; 1-2; 3-5; 6-10; 10-15; 20+                             | -     | 0.31    | 0.63 |
| Q8. Drink well water                        | 591 | Nominal  | No; Yes with treatment; Yes without treatment              | -     | 0.74    | 0.95 |
| Q9. Have a septic                           | 594 | Nominal  | Yes; No                                                    | -     | 0.98    | 1.00 |
| Q9B. Empty septic (years)                   | 549 | Interval | <1; 1-2; 3-5; 6-10; 10+; When problem; Haven't yet         | -     | 0.29    | 0.98 |
| Q10A. No treatment                          | 578 | Nominal  | Yes; No                                                    | -     | 0.41    | 0.99 |
| Q10B. Sediment filter                       | 579 | Nominal  | Yes; No                                                    | -     | 0.89    | 0.93 |
| Q10C. Reserve Osmosis                       | 579 | Nominal  | Yes; No                                                    | -     | 0.98    | 0.99 |
| Q10D. Iron removal                          | 580 | Nominal  | Yes; No                                                    | -     | 0.39    | 0.43 |
| Q10E. Acid neutralizer                      | 580 | Nominal  | Yes; No                                                    | -     | Removed |      |
| Q10F. UV light                              | 580 | Nominal  | Yes; No                                                    | -     | 0.98    | 0.99 |
| Q10G. Chlorinator                           | 580 | Nominal  | Yes; No                                                    | -     | 0.16    | 0.73 |
| Q10H. Water softener                        | 580 | Nominal  | Yes; No                                                    | -     | 0.07    | 0.07 |
| Q10I. Carbon unit                           | 580 | Nominal  | Yes; No                                                    | -     | 0.57    | 0.34 |
| Q11B. Height of floodwater observed in home | 212 | Interval | Inches; Knee Height; Waist deep; Above my head; Don't know | -     | 0.07    | 0.17 |
| Q12. Submerged wellhead                     | 476 | Nominal  | Yes; No; Don't Know                                        | -     | 0.00    | 0.00 |
| Q13. Damage to well                         | 541 | Nominal  | Yes; No; Don't Know                                        | -     | 0.97    | 0.98 |
| Q14. Damaged to septic                      | 510 | Nominal  | Yes; No; Don't Know                                        | -     | 0.89    | 0.43 |
| Q15G. Used water for cooking                | 580 | Nominal  | Yes; No                                                    | -     | 0.04    | 0.00 |
| Q15H. Used water for drinking               | 579 | Nominal  | Yes; No                                                    | -     | 0.98    | 0.99 |
| Q15I. Used water for bathing                | 580 | Nominal  | Yes; No                                                    | -     | 0.58    | 0.00 |
| Q15J. Used water for pets                   | 578 | Nominal  | Yes; No                                                    | -     | 0.99    | 0.99 |
| Q15K. Used water for laundry                | 580 | Nominal  | Yes; No                                                    | -     | 0.35    | 0.00 |
| Q15L. Used water for cleanup                | 580 | Nominal  | Yes; No                                                    | -     | 0.66    | 0.07 |
| Q16E. Unfiltered well water                 | 577 | Nominal  | Yes; No                                                    | -     | 0.56    | 0.06 |
| Q16F. Bottled water                         | 577 | Nominal  | Yes; No                                                    | -     | 0.09    | 0.01 |
| Q16G. Filtered well water                   | 576 | Nominal  | Yes; No                                                    | -     | 0.98    | 0.99 |

|                                                         |     |          |                                                                                                                                                 |                                                                                                                                                                        |      |      |
|---------------------------------------------------------|-----|----------|-------------------------------------------------------------------------------------------------------------------------------------------------|------------------------------------------------------------------------------------------------------------------------------------------------------------------------|------|------|
| Q17D. Water safe for drinking                           | 556 | Interval | Likert scale                                                                                                                                    | 1-5                                                                                                                                                                    | 0.02 | 0.00 |
| Q17E. Water safe for cooking                            | 558 | Interval | Likert scale                                                                                                                                    | 1-5                                                                                                                                                                    | 0.02 | 0.00 |
| Q17F. Water safe for bathing                            | 561 | Interval | Likert scale                                                                                                                                    | 1-5                                                                                                                                                                    | 0.04 | 0.00 |
| Q18B. Disinfected after                                 | 173 | Nominal  | Pre; Post                                                                                                                                       | -                                                                                                                                                                      | 0.99 | 0.99 |
| Q21B. Provide info about testing well                   | 556 | Nominal  | Yes; No; Don't Know                                                                                                                             | -                                                                                                                                                                      | 0.57 | 0.99 |
| Q22B. Provide info about treating well                  | 547 | Nominal  | Yes; No; Don't Know                                                                                                                             | -                                                                                                                                                                      | 0.89 | 0.99 |
| Q23B. Provide info about well maintenance               | 516 | Nominal  | Yes; No; Don't Know                                                                                                                             | -                                                                                                                                                                      | 0.73 | 0.90 |
| Q24A. Comfortable managing well                         | 577 | Interval | Likert scale                                                                                                                                    | 1-5                                                                                                                                                                    | 0.37 | 0.15 |
| Q24B. Know here to find info about well characteristics | 571 | Interval | Likert scale                                                                                                                                    | 1-5                                                                                                                                                                    | 0.81 | 0.44 |
| Q24C. Know where to find info about testing             | 569 | Interval | Likert scale                                                                                                                                    | 1-5                                                                                                                                                                    | 0.89 | 0.61 |
| Q24D. Know where to find info about treatment           | 565 | Interval | Likert scale                                                                                                                                    | 1-5                                                                                                                                                                    | 0.42 | 0.67 |
| Q26. Household income                                   | 431 | Interval | Levels 1-4                                                                                                                                      | \$12,000 or below; \$12,001 - \$24,000; \$24,001 - \$45,000; \$45,001 - \$65,000; \$65,001 - \$85,000; \$85,001 - \$100,000; \$100,001 - \$150,000; \$150,001 or above | 0.77 | 0.58 |
| Q27. Household ethnicity                                | 541 | Nominal  | American Indian or Alaska Native; Asian; Black or African American; Hispanic or Latino; Pacific Islander; Two or more races; White or Caucasian | -                                                                                                                                                                      | 0.98 | 0.99 |
| Q28. Household education CODE                           | 549 | Nominal  | Levels 1-5                                                                                                                                      | Some High School; High School Graduate; Some College; College Graduate; Post College (MS, PhD)                                                                         | 0.71 | 0.40 |
| Q30A. Someone sick from consuming well after            | 519 | Nominal  | Yes; No; Don't Know                                                                                                                             | -                                                                                                                                                                      | 0.54 | 0.98 |
| Q31A. Someone sick from contacting water after          | 547 | Nominal  | Yes; No; Don't Know                                                                                                                             | -                                                                                                                                                                      | 0.54 | 0.04 |

Table S2. Water quality variables used in logistic regression

| Variable                 | n   | Type  | Levels               | Range         | p-value |       |
|--------------------------|-----|-------|----------------------|---------------|---------|-------|
| Water Quality Data Model |     |       |                      |               |         |       |
| F                        | 326 | Ratio | Concentration (mg/L) | <0.01-2.8     | 0.59    | 0.12  |
| Cl                       | 326 | Ratio | Concentration (mg/L) | <0.01-1,034.3 | 0.94    | 0.035 |
| Br                       | 326 | Ratio | Concentration (mg/L) | <0.01-45.7    | 0.43    | 0.064 |
| NO3                      | 326 | Ratio | Concentration (mg/L) | <0.01-24      | 0.38    | 0.64  |
| PO4                      | 326 | Ratio | Concentration (mg/L) | <0.01-0.8     | 0.38    | 0.60  |
| SO4                      | 326 | Ratio | Concentration (mg/L) | <0.01-214.6   | 0.96    | 0.74  |
| Na                       | 413 | Ratio | Concentration (mg/L) | <0.05-1,475   | 0.01    | <0.01 |
| Mg                       | 413 | Ratio | Concentration (µg/L) | <10.0-39,690  | 0.15    | 0.27  |
| Al                       | 413 | Ratio | Concentration (µg/L) | <5.0-5,945    | 0.61    | 0.50  |
| Si                       | 413 | Ratio | Concentration (µg/L) | <5.0-26,800   | 0.45    | 0.00  |
| P                        | 413 | Ratio | Concentration (µg/L) | <10.0-11,490  | 0.53    | 0.94  |
| K                        | 413 | Ratio | Concentration (µg/L) | <10.0-57,610  | 0.73    | 0.36  |
| Ca                       | 413 | Ratio | Concentration (µg/L) | <50-202,400   | 0.19    | 0.72  |
| Ti                       | 413 | Ratio | Concentration (µg/L) | <1.0-87.2     | 0.67    | 0.19  |
| V                        | 413 | Ratio | Concentration (µg/L) | <1.0-40       | 0.25    | 0.45  |
| Cr                       | 413 | Ratio | Concentration (µg/L) | <1.0-1,233    | 0.86    | 0.35  |
| Fe                       | 413 | Ratio | Concentration (µg/L) | <10.0-8,826   | 0.61    | 0.41  |
| Mn                       | 413 | Ratio | Concentration (µg/L) | <1.0-1,412    | 0.61    | <0.01 |
| Co                       | 413 | Ratio | Concentration (µg/L) | <1.0-6.4      | 0.11    | 0.01  |
| Ni                       | 413 | Ratio | Concentration (µg/L) | <1.0-39.8     | 0.81    | 0.72  |
| Cu                       | 413 | Ratio | Concentration (µg/L) | <1.0-1,710    | 0.10    | 0.16  |
| Zn                       | 413 | Ratio | Concentration (µg/L) | <5.0-10,470   | 0.09    | 0.88  |
| As                       | 413 | Ratio | Concentration (µg/L) | <0.5-56.9     | 0.43    | 0.00  |
| Se                       | 413 | Ratio | Concentration (µg/L) | <2.5-23.2     | 0.09    | 0.20  |
| Br                       | 413 | Ratio | Concentration (µg/L) | <1.0-3,578    | 0.51    | 0.26  |
| Sr                       | 413 | Ratio | Concentration (µg/L) | <1.0-1,572    | 0.13    | 0.27  |
| Mo                       | 413 | Ratio | Concentration (µg/L) | <0.1-73.8     | 0.97    | 0.34  |
| Ag                       | 413 | Ratio | Concentration (µg/L) | <1.0-7        | 0.98    | 0.99  |
| Cd                       | 413 | Ratio | Concentration (µg/L) | <1.0-5.7      | 0.98    | 0.99  |
| Sn                       | 413 | Ratio | Concentration (µg/L) | <1.0-9.7      | 0.90    | 0.14  |
| Ba                       | 413 | Ratio | Concentration (µg/L) | <1.0-1,131    | 0.91    | 0.77  |
| Pb                       | 413 | Ratio | Concentration (µg/L) | <1.0-372.1    | 0.97    | 0.87  |
| U                        | 413 | Ratio | Concentration (µg/L) | <1.0-151.3    | 0.35    | 0.05  |
| Hardness                 | 413 | Ratio | Concentration (µg/L) | <0.01-647     | 0.16    | 0.98  |

Table S3. Peak flooding dates derived from the US Geological Survey stream gage data

| <b>County</b> | <b>Peak Date</b> |
|---------------|------------------|
| Aransas       | 8/18             |
| Austin        | 8/22             |
| Bee           | 8/26             |
| Brazoria      | 9/12             |
| Calhoun       | 8/28             |
| Chambers      | 8/17             |
| Childress     | NA               |
| Colorado      | 9/4              |
| DeWitt        | 8/28             |
| Galveston     | 8/24             |
| Goliad        | 8/13             |
| Gonzales      | 9/8              |
| Hardin        | 8/31             |
| Harris        | 9/13             |
| Jackson       | 8/29             |
| Jasper        | 9/1              |
| Jefferson     | 8/26             |
| La Salle      | 8/21             |
| Lavaca        | 9/3              |
| Liberty       | 8/31             |
| Matagorda     | 9/7              |
| Montgomery    | 9/1              |
| Newton        | 9/2              |
| Orange        | 8/30             |
| Refugio       | 8/21             |
| Sabine        | NA               |
| San Jacinto   | 8/31             |
| San Patricio  | 8/6              |
| Tyler         | 8/31             |
| Victoria      | 8/25             |
| Waller        | 9/2              |
| Washington    | 8/22             |
| Wharton       | 9/4              |

Table S4. Private well information in the 41 disaster declared counties

| County       | CDC classification | % of county inundated | Total population | Estimated well users | % population on well water | # of well users inundated | % of well users inundated |
|--------------|--------------------|-----------------------|------------------|----------------------|----------------------------|---------------------------|---------------------------|
| Aransas      | 3                  | 65.2%                 | 23,724           | 3,503                | 14.8%                      | 452                       | 12.9%                     |
| Austin       | 2                  | 5.0%                  | 31,504           | 9,739                | 30.9%                      | 125                       | 1.3%                      |
| Bastrop      | 2                  | 0.5%                  | 88,157           | 3,479                | 3.9%                       | 6                         | 0.2%                      |
| Bee          | 5                  | 0.0%                  | 33,240           | 9,301                | 28.0%                      | 1                         | 0.0%                      |
| Brazoria     | 2                  | 31.9%                 | 375,517          | 56,305               | 15.0%                      | 2,922                     | 5.2%                      |
| Caldwell     | 2                  | 0.1%                  | 42,593           | 2,340                | 5.5%                       | 1                         | 0.0%                      |
| Calhoun      | 5                  | 62.9%                 | 21,955           | 2,836                | 12.9%                      | 324                       | 11.4%                     |
| Chambers     | 2                  | 50.6%                 | 43,018           | 5,069                | 11.8%                      | 822                       | 16.2%                     |
| Colorado     | 6                  | 5.3%                  | 21,730           | 7,372                | 33.9%                      | 91                        | 1.2%                      |
| DeWitt       | 6                  | 1.1%                  | 20,938           | 6,999                | 33.4%                      | 32                        | 0.5%                      |
| Fayette      | 6                  | 2.3%                  | 25,857           | 8,109                | 31.4%                      | 51                        | 0.6%                      |
| Fort Bend    | 2                  | 9.2%                  | 779,600          | 27,008               | 3.5%                       | 1,320                     | 4.9%                      |
| Galveston    | 2                  | 64.4%                 | 337,503          | 16,514               | 4.9%                       | 366                       | 2.2%                      |
| Goliad       | 4                  | 0.5%                  | 7,791            | 3,664                | 47.0%                      | 11                        | 0.3%                      |
| Gonzales     | 6                  | 0.7%                  | 20,641           | 2,979                | 14.4%                      | 3                         | 0.1%                      |
| Grimes       | 6                  | 2.3%                  | 28,871           | 9,371                | 32.5%                      | 67                        | 0.7%                      |
| Hardin       | 3                  | 0.2%                  | 58,355           | 12,329               | 21.1%                      | 19                        | 0.2%                      |
| Harris       | 1                  | 7.4%                  | 4,686,778        | 106,039              | 2.3%                       | 2,201                     | 2.1%                      |
| Jackson      | 6                  | 8.8%                  | 15,234           | 4,426                | 29.1%                      | 150                       | 3.4%                      |
| Jasper       | 6                  | 3.0%                  | 36,407           | 12,846               | 35.3%                      | 27                        | 0.2%                      |
| Jefferson    | 3                  | 47.5%                 | 252,469          | 3,888                | 1.5%                       | 497                       | 12.8%                     |
| Karnes       | 6                  | 0.0%                  | 15,318           | 2,308                | 15.1%                      | 0                         | 0.0%                      |
| Kleberg      | 5                  | 20.5%                 | 32,295           | 2,491                | 7.7%                       | 10                        | 0.4%                      |
| Lavaca       | 6                  | 0.9%                  | 20,256           | 9,362                | 46.2%                      | 30                        | 0.3%                      |
| Lee          | 6                  | 1.5%                  | 17,366           | 2,222                | 12.8%                      | 9                         | 0.4%                      |
| Liberty      | 2                  | 4.6%                  | 86,495           | 19,448               | 22.5%                      | 510                       | 2.6%                      |
| Matagorda    | 5                  | 40.9%                 | 36,550           | 8,884                | 24.3%                      | 634                       | 7.1%                      |
| Montgomery   | 2                  | 4.7%                  | 594,453          | 47,896               | 8.1%                       | 483                       | 1.0%                      |
| Newton       | 3                  | 0.8%                  | 13,759           | 6,964                | 50.6%                      | 17                        | 0.2%                      |
| Nueces       | 3                  | 30.7%                 | 361,243          | 6,158                | 1.7%                       | 60                        | 1.0%                      |
| Orange       | 3                  | 17.7%                 | 84,862           | 28,197               | 33.2%                      | 227                       | 0.8%                      |
| Polk         | 6                  | 5.6%                  | 49,556           | 5,749                | 11.6%                      | 271                       | 4.7%                      |
| Refugio      | 6                  | 13.3%                 | 6,944            | 1,646                | 23.7%                      | 126                       | 7.7%                      |
| Sabine       | 6                  | 17.6%                 | 11,038           | 2,736                | 24.8%                      | 338                       | 12.3%                     |
| San Jacinto  | 6                  | 10.4%                 | 29,190           | 5,995                | 20.5%                      | 158                       | 2.6%                      |
| San Patricio | 3                  | 6.8%                  | 65,920           | 7,321                | 11.1%                      | 235                       | 3.2%                      |
| Tyler        | 6                  | 1.0%                  | 22,437           | 5,714                | 25.5%                      | 8                         | 0.1%                      |
| Victoria     | 4                  | 6.0%                  | 92,025           | 15,179               | 16.5%                      | 491                       | 3.2%                      |
| Walker       | 5                  | 3.3%                  | 74,359           | 7,997                | 10.8%                      | 61                        | 0.8%                      |
| Waller       | 2                  | 4.6%                  | 53,305           | 8,921                | 16.7%                      | 69                        | 0.8%                      |
| Wharton      | 5                  | 14.9%                 | 41,093           | 16,719               | 40.7%                      | 1,835                     | 11.0%                     |

CDC Codes – 1: Large central metro; 2: Large fringe metro; 3: Medium metro; 4: Small metro; 5: Micropolitan; 6: noncore

Table S5. Comparison of sampling rates by the three campaigns

| Month        | # samples |       |     |     | TC positive |     |     |     | EC positive |     |     |     |
|--------------|-----------|-------|-----|-----|-------------|-----|-----|-----|-------------|-----|-----|-----|
|              | BHD       | HHD   | UR1 | UR2 | BHD         | HHD | UR1 | UR2 | BHD         | HHD | UR1 | UR2 |
| Aug          | 25        | -     | -   | -   | 4           | -   | -   | -   | -           | -   | -   | -   |
| Sept         | 3040      | 1709  | 432 | -   | 837         | 776 | 203 | -   | -           | 283 | 57  | -   |
| Oct          | 697       | 463   | 198 | -   | 120         | 155 | 90  | -   | -           | 38  | 18  | -   |
| Nov          | 326       | 187   | -   | 533 | 43          | 50  | -   | 151 | -           | 7   | -   | 15  |
| Dec          | 107       | -     | -   | -   | 10          | -   | -   | -   | -           | -   | -   | -   |
| Jan          | 38        | -     | -   | 160 | 3           | -   | -   | 45  | -           | -   | -   | 6   |
| Feb          | 44        | -     | -   | 205 | 5           | -   | -   | 53  | -           | -   | -   | 3   |
| Mar          | 49        | -     | -   | -   | 0           | -   | -   | -   | -           | -   | -   | -   |
| Apr          | 155       | -     | -   | -   | 20          | -   | -   | -   | -           | -   | -   | -   |
| May          | 180       | -     | -   | -   | 24          | -   | -   | -   | -           | -   | -   | -   |
| Jun          | 274       | -     | -   | -   | 20          | -   | -   | -   | -           | -   | -   | -   |
| <b>Total</b> | 4,935     | 2,359 | 630 | 898 | 1,086       | 981 | 293 | 249 | -           | 328 | 75  | 24  |
|              | 8,822     |       |     |     | 2,609       |     |     |     | 427         |     |     |     |

BHD: Brazoria Health Department

HHD: Houston Health Department

UR1 University testing Round 1

UR2: University testing Round 2

Table S6. Private well testing results in the 41 disaster declared counties from the three campaigns

| County       | Total coliform |            | <i>E. coli</i> |            |
|--------------|----------------|------------|----------------|------------|
|              | n              | % positive | n              | % positive |
| Aransas      | 89             | 38.2%      | 89             | 38.2%      |
| Austin       | 48             | 37.5%      | 47             | 10.6%      |
| Bee          | 1              | 100.0%     | 1              | 100.0%     |
| Brazoria     | 4,285          | 22.2%      | 34             | 11.8%      |
| Caldwell     | 0              | -          | 0              | -          |
| Calhoun      | 31             | 29.0%      | 31             | 29.0%      |
| Chambers     | 73             | 27.4%      | 73             | 26.0%      |
| Colorado     | 10             | 20.0%      | 9              | 22.2%      |
| DeWitt       | 32             | 40.6%      | 32             | 40.6%      |
| Fayette      | 1              | 0.0%       | 1              | 0.0%       |
| Fort Bend    | 777            | 37.8%      | 702            | 9.4%       |
| Galveston    | 216            | 19.0%      | 73             | 21.9%      |
| Goliad       | 8              | 50.0%      | 8              | 50.0%      |
| Gonzales     | 2              | 50.0%      | 2              | 50.0%      |
| Grimes       | 1              | 0.0%       | 0              | -          |
| Hardin       | 124            | 31.5%      | 124            | 31.5%      |
| Harris       | 1,455          | 41.6%      | 1,440          | 17.9%      |
| Jackson      | 49             | 30.6%      | 49             | 30.6%      |
| Jasper       | 28             | 39.3%      | 28             | 39.3%      |
| Jefferson    | 40             | 45.0%      | 40             | 45.0%      |
| Karnes       | 0              | -          | 0              | -          |
| Lavaca       | 6              | 33.3%      | 6              | 33.3%      |
| Lee          | 0              | -          | 0              | -          |
| Liberty      | 67             | 41.8%      | 67             | 41.8%      |
| Matagorda    | 140            | 22.1%      | 24             | 12.5%      |
| Montgomery   | 14             | 50.0%      | 14             | 14.3%      |
| Newton       | 25             | 44.0%      | 25             | 44.0%      |
| Nueces       | 5              | 60.0%      | 5              | 60.0%      |
| Orange       | 192            | 27.6%      | 192            | 27.6%      |
| Polk         | 0              | -          | 0              | -          |
| Refugio      | 38             | 52.6%      | 38             | 52.6%      |
| Sabine       | 1              | 0.0%       | 1              | 0.0%       |
| San Jacinto  | 7              | 14.3%      | 7              | 14.3%      |
| San Patricio | 19             | 57.9%      | 19             | 57.9%      |
| Tyler        | 5              | 40.0%      | 5              | 40.0%      |
| Victoria     | 139            | 43.2%      | 139            | 43.2%      |
| Walker       | 2              | 0.0%       | 2              | 0.0%       |
| Waller       | 92             | 40.2%      | 92             | 19.6%      |
| Wharton      | 688            | 33.4%      | 389            | 31.9%      |



Table S7. Zip-code level private well testing results in the 41 disaster declared counties from the three campaigns

| Zip Code | Total coliform |            | E. coli |            |
|----------|----------------|------------|---------|------------|
|          | n              | % positive | n       | % positive |
| 75928    | 3              | 33.3%      | 3       | 33.3%      |
| 75931    | 3              | 33.3%      | 3       | 33.3%      |
| 75932    | 1              | 0.0%       | 1       | 0.0%       |
| 75933    | 5              | 40.0%      | 5       | 40.0%      |
| 75951    | 3              | 66.7%      | 3       | 66.7%      |
| 75956    | 6              | 66.7%      | 6       | 66.7%      |
| 75966    | 1              | 100.0%     | 1       | 100.0%     |
| 75979    | 1              | 100.0%     | 1       | 100.0%     |
| 76126    | 1              | 0.0%       | 1       | 0.0%       |
| 76849    | 1              | 0.0%       | 1       | 0.0%       |
| 77002    | 14             | 7.1%       | 14      | 0.0%       |
| 77003    | 1              | 0.0%       | 1       | 0.0%       |
| 77004    | 3              | 0.0%       | 3       | 0.0%       |
| 77005    | 5              | 60.0%      | 5       | 40.0%      |
| 77006    | 2              | 0.0%       | 2       | 0.0%       |
| 77008    | 1              | 0.0%       | 1       | 0.0%       |
| 77009    | 1              | 0.0%       | 1       | 0.0%       |
| 77015    | 7              | 0.0%       | 7       | 0.0%       |
| 77017    | 2              | 0.0%       | 2       | 0.0%       |
| 77023    | 1              | 0.0%       | 1       | 0.0%       |
| 77024    | 8              | 12.5%      | 8       | 0.0%       |
| 77025    | 2              | 0.0%       | 2       | 0.0%       |
| 77027    | 15             | 6.7%       | 15      | 0.0%       |
| 77029    | 2              | 50.0%      | 2       | 0.0%       |
| 77030    | 8              | 0.0%       | 8       | 0.0%       |
| 77032    | 6              | 50.0%      | 6       | 50.0%      |
| 77033    | 1              | 0.0%       | 1       | 0.0%       |
| 77034    | 6              | 0.0%       | 6       | 0.0%       |
| 77036    | 3              | 0.0%       | 3       | 0.0%       |
| 77037    | 28             | 50.0%      | 28      | 10.7%      |
| 77038    | 1              | 0.0%       | 1       | 0.0%       |
| 77039    | 35             | 48.6%      | 35      | 34.3%      |
| 77040    | 3              | 33.3%      | 3       | 0.0%       |
| 77041    | 10             | 50.0%      | 10      | 20.0%      |
| 77042    | 4              | 50.0%      | 4       | 50.0%      |
| 77044    | 31             | 48.4%      | 31      | 29.0%      |
| 77045    | 3              | 0.0%       | 3       | 0.0%       |
| 77047    | 5              | 0.0%       | 5       | 0.0%       |
| 77048    | 1              | 0.0%       | 1       | 0.0%       |
| 77049    | 2              | 0.0%       | 2       | 0.0%       |
| 77050    | 6              | 66.7%      | 6       | 33.3%      |
| 77054    | 22             | 4.5%       | 22      | 0.0%       |
| 77055    | 2              | 0.0%       | 2       | 0.0%       |
| 77057    | 4              | 0.0%       | 4       | 0.0%       |
| 77060    | 2              | 50.0%      | 2       | 50.0%      |
| 77063    | 1              | 100.0%     | 1       | 0.0%       |
| 77064    | 8              | 25.0%      | 8       | 0.0%       |
| 77065    | 77             | 61.0%      | 77      | 16.9%      |
| 77066    | 67             | 1.5%       | 67      | 0.0%       |
| 77068    | 5              | 20.0%      | 5       | 0.0%       |

|       |     |        |     |        |
|-------|-----|--------|-----|--------|
| 77069 | 4   | 50.0%  | 4   | 50.0%  |
| 77070 | 9   | 33.3%  | 9   | 22.2%  |
| 77072 | 3   | 0.0%   | 3   | 0.0%   |
| 77073 | 1   | 0.0%   | 1   | 0.0%   |
| 77074 | 1   | 0.0%   | 1   | 0.0%   |
| 77075 | 1   | 0.0%   | 1   | 0.0%   |
| 77076 | 2   | 50.0%  | 2   | 0.0%   |
| 77079 | 9   | 11.1%  | 9   | 0.0%   |
| 77080 | 1   | 100.0% | 1   | 100.0% |
| 77081 | 2   | 0.0%   | 2   | 0.0%   |
| 77082 | 2   | 0.0%   | 2   | 0.0%   |
| 77083 | 1   | 0.0%   | 1   | 0.0%   |
| 77084 | 6   | 50.0%  | 6   | 50.0%  |
| 77086 | 5   | 80.0%  | 5   | 20.0%  |
| 77089 | 1   | 0.0%   | 1   | 0.0%   |
| 77090 | 1   | 100.0% | 1   | 0.0%   |
| 77092 | 1   | 0.0%   | 1   | 0.0%   |
| 77093 | 5   | 40.0%  | 5   | 20.0%  |
| 77094 | 3   | 33.3%  | 3   | 0.0%   |
| 77096 | 2   | 0.0%   | 2   | 0.0%   |
| 77099 | 1   | 0.0%   | 1   | 0.0%   |
| 77249 | 1   | 100.0% | 1   | 100.0% |
| 77316 | 1   | 0.0%   | 1   | 0.0%   |
| 77327 | 4   | 50.0%  | 4   | 50.0%  |
| 77328 | 2   | 0.0%   | 2   | 0.0%   |
| 77336 | 22  | 45.5%  | 22  | 22.7%  |
| 77338 | 10  | 60.0%  | 10  | 50.0%  |
| 77339 | 1   | 0.0%   | 1   | 0.0%   |
| 77340 | 2   | 0.0%   | 2   | 0.0%   |
| 77354 | 5   | 80.0%  | 5   | 20.0%  |
| 77357 | 6   | 33.3%  | 6   | 0.0%   |
| 77371 | 6   | 16.7%  | 6   | 16.7%  |
| 77372 | 1   | 100.0% | 1   | 100.0% |
| 77373 | 3   | 100.0% | 3   | 100.0% |
| 77374 | 1   | 0.0%   | 1   | 0.0%   |
| 77375 | 11  | 63.6%  | 11  | 18.2%  |
| 77377 | 14  | 50.0%  | 14  | 0.0%   |
| 77379 | 21  | 0.0%   | 21  | 0.0%   |
| 77388 | 3   | 33.3%  | 3   | 0.0%   |
| 77389 | 1   | 0.0%   | 1   | 0.0%   |
| 77406 | 258 | 32.9%  | 258 | 9.3%   |
| 77407 | 2   | 50.0%  | 2   | 0.0%   |
| 77414 | 66  | 15.2%  | 10  | 0.0%   |
| 77415 | 7   | 0.0%   | 2   | 0.0%   |
| 77417 | 3   | 33.3%  | 3   | 0.0%   |
| 77419 | 1   | 0.0%   | 0   | -      |
| 77420 | 76  | 32.9%  | 47  | 29.8%  |
| 77422 | 782 | 26.5%  | 3   | 0.0%   |
| 77423 | 27  | 59.3%  | 27  | 14.8%  |
| 77426 | 1   | 0.0%   | 1   | 0.0%   |
| 77427 | 3   | 66.7%  | 3   | 33.3%  |
| 77429 | 521 | 53.0%  | 521 | 21.3%  |
| 77430 | 88  | 45.5%  | 5   | 0.0%   |

|       |       |        |     |        |
|-------|-------|--------|-----|--------|
| 77432 | 3     | 33.3%  | 2   | 0.0%   |
| 77433 | 13    | 38.5%  | 12  | 16.7%  |
| 77434 | 8     | 12.5%  | 8   | 12.5%  |
| 77435 | 67    | 31.3%  | 31  | 32.3%  |
| 77436 | 12    | 33.3%  | 6   | 50.0%  |
| 77437 | 40    | 15.0%  | 12  | 16.7%  |
| 77439 | 1     | 0.0%   | 1   | 0.0%   |
| 77441 | 16    | 50.0%  | 16  | 12.5%  |
| 77443 | 6     | 16.7%  | 1   | 100.0% |
| 77444 | 38    | 10.5%  | 0   | -      |
| 77445 | 39    | 25.6%  | 39  | 17.9%  |
| 77447 | 13    | 38.5%  | 13  | 23.1%  |
| 77448 | 2     | 0.0%   | 2   | 0.0%   |
| 77449 | 1     | 100.0% | 1   | 0.0%   |
| 77454 | 1     | 0.0%   | 1   | 0.0%   |
| 77455 | 3     | 33.3%  | 3   | 33.3%  |
| 77456 | 3     | 66.7%  | 3   | 66.7%  |
| 77457 | 2     | 0.0%   | 2   | 0.0%   |
| 77459 | 24    | 41.7%  | 18  | 11.1%  |
| 77461 | 41    | 43.9%  | 41  | 2.4%   |
| 77463 | 3     | 33.3%  | 0   | -      |
| 77464 | 3     | 33.3%  | 3   | 0.0%   |
| 77465 | 4     | 0.0%   | 3   | 0.0%   |
| 77467 | 7     | 28.6%  | 7   | 0.0%   |
| 77468 | 3     | 0.0%   | 1   | 0.0%   |
| 77469 | 27    | 33.3%  | 21  | 0.0%   |
| 77471 | 49    | 34.7%  | 46  | 8.7%   |
| 77474 | 11    | 36.4%  | 11  | 9.1%   |
| 77476 | 164   | 47.0%  | 164 | 11.6%  |
| 77478 | 2     | 0.0%   | 2   | 0.0%   |
| 77479 | 7     | 28.6%  | 7   | 0.0%   |
| 77480 | 188   | 28.2%  | 0   | -      |
| 77481 | 22    | 45.5%  | 22  | 0.0%   |
| 77482 | 29    | 41.4%  | 4   | 25.0%  |
| 77484 | 14    | 35.7%  | 14  | 35.7%  |
| 77485 | 75    | 37.3%  | 74  | 12.2%  |
| 77486 | 109   | 30.3%  | 0   | -      |
| 77488 | 474   | 35.9%  | 276 | 34.1%  |
| 77492 | 1     | 0.0%   | 1   | 0.0%   |
| 77493 | 34    | 55.9%  | 34  | 20.6%  |
| 77494 | 49    | 38.8%  | 49  | 6.1%   |
| 77496 | 1     | 0.0%   | 1   | 0.0%   |
| 77497 | 1     | 0.0%   | 1   | 0.0%   |
| 77498 | 1     | 0.0%   | 1   | 0.0%   |
| 77506 | 2     | 0.0%   | 2   | 0.0%   |
| 77507 | 6     | 0.0%   | 6   | 0.0%   |
| 77510 | 81    | 13.6%  | 29  | 13.8%  |
| 77511 | 226   | 34.1%  | 8   | 0.0%   |
| 77514 | 1     | 0.0%   | 1   | 0.0%   |
| 77515 | 1,605 | 28.7%  | 0   | -      |
| 77516 | 22    | 54.5%  | 0   | -      |
| 77517 | 72    | 13.9%  | 19  | 26.3%  |
| 77520 | 1     | 100.0% | 1   | 100.0% |

|       |     |        |     |        |
|-------|-----|--------|-----|--------|
| 77521 | 79  | 29.1%  | 79  | 19.0%  |
| 77523 | 38  | 23.7%  | 38  | 21.1%  |
| 77531 | 116 | 24.1%  | 0   | -      |
| 77532 | 219 | 47.9%  | 219 | 21.9%  |
| 77534 | 74  | 33.8%  | 0   | -      |
| 77535 | 30  | 53.3%  | 30  | 53.3%  |
| 77536 | 4   | 0.0%   | 4   | 0.0%   |
| 77538 | 1   | 0.0%   | 1   | 0.0%   |
| 77539 | 23  | 30.4%  | 12  | 33.3%  |
| 77541 | 129 | 31.8%  | 0   | -      |
| 77542 | 7   | 42.9%  | 0   | -      |
| 77545 | 14  | 85.7%  | 13  | 46.2%  |
| 77546 | 1   | 100.0% | 1   | 0.0%   |
| 77550 | 1   | 0.0%   | 1   | 0.0%   |
| 77555 | 0   | -      | 0   | -      |
| 77560 | 4   | 75.0%  | 4   | 75.0%  |
| 77562 | 10  | 20.0%  | 10  | 0.0%   |
| 77564 | 2   | 50.0%  | 2   | 50.0%  |
| 77565 | 2   | 50.0%  | 2   | 50.0%  |
| 77566 | 425 | 0.7%   | 5   | 60.0%  |
| 77573 | 1   | 100.0% | 1   | 100.0% |
| 77575 | 30  | 26.7%  | 30  | 26.7%  |
| 77577 | 56  | 0.0%   | 0   | -      |
| 77578 | 44  | 6.8%   | 7   | 0.0%   |
| 77581 | 250 | 0.4%   | 2   | 0.0%   |
| 77583 | 265 | 0.4%   | 2   | 50.0%  |
| 77584 | 15  | 13.3%  | 5   | 0.0%   |
| 77585 | 3   | 66.7%  | 3   | 66.7%  |
| 77590 | 1   | 0.0%   | 1   | 0.0%   |
| 77591 | 7   | 14.3%  | 6   | 16.7%  |
| 77611 | 3   | 0.0%   | 3   | 0.0%   |
| 77612 | 1   | 100.0% | 1   | 100.0% |
| 77613 | 3   | 33.3%  | 3   | 33.3%  |
| 77619 | 1   | 100.0% | 1   | 100.0% |
| 77622 | 20  | 50.0%  | 20  | 50.0%  |
| 77624 | 1   | 0.0%   | 1   | 0.0%   |
| 77625 | 56  | 26.8%  | 56  | 26.8%  |
| 77629 | 1   | 0.0%   | 1   | 0.0%   |
| 77630 | 47  | 21.3%  | 47  | 21.3%  |
| 77632 | 59  | 44.1%  | 59  | 44.1%  |
| 77656 | 22  | 40.9%  | 22  | 40.9%  |
| 77657 | 20  | 35.0%  | 20  | 35.0%  |
| 77659 | 21  | 23.8%  | 21  | 23.8%  |
| 77661 | 5   | 40.0%  | 5   | 40.0%  |
| 77662 | 114 | 23.7%  | 114 | 23.7%  |
| 77663 | 2   | 50.0%  | 2   | 50.0%  |
| 77664 | 2   | 0.0%   | 2   | 0.0%   |
| 77665 | 27  | 25.9%  | 27  | 25.9%  |
| 77705 | 1   | 100.0% | 1   | 100.0% |
| 77713 | 6   | 50.0%  | 6   | 50.0%  |
| 77833 | 2   | 50.0%  | 2   | 50.0%  |
| 77834 | 3   | 0.0%   | 3   | 0.0%   |
| 77868 | 2   | 0.0%   | 0   | -      |

|       |    |        |    |        |
|-------|----|--------|----|--------|
| 77901 | 1  | 100.0% | 1  | 100.0% |
| 77904 | 38 | 36.8%  | 38 | 36.8%  |
| 77905 | 72 | 45.8%  | 72 | 45.8%  |
| 77954 | 27 | 40.7%  | 27 | 40.7%  |
| 77957 | 26 | 38.5%  | 26 | 38.5%  |
| 77961 | 2  | 0.0%   | 2  | 0.0%   |
| 77962 | 9  | 11.1%  | 9  | 11.1%  |
| 77963 | 3  | 33.3%  | 3  | 33.3%  |
| 77964 | 1  | 0.0%   | 1  | 0.0%   |
| 77968 | 24 | 33.3%  | 24 | 33.3%  |
| 77971 | 8  | 37.5%  | 8  | 37.5%  |
| 77974 | 1  | 100.0% | 1  | 100.0% |
| 77975 | 1  | 100.0% | 1  | 100.0% |
| 77979 | 26 | 26.9%  | 26 | 26.9%  |
| 77983 | 5  | 20.0%  | 5  | 20.0%  |
| 77988 | 6  | 83.3%  | 6  | 83.3%  |
| 77990 | 14 | 50.0%  | 14 | 50.0%  |
| 77991 | 1  | 0.0%   | 1  | 0.0%   |
| 77995 | 8  | 25.0%  | 8  | 25.0%  |
| 78132 | 1  | 0.0%   | 1  | 0.0%   |
| 78164 | 1  | 100.0% | 1  | 100.0% |
| 78233 | 1  | 0.0%   | 1  | 0.0%   |
| 78247 | 1  | 0.0%   | 1  | 0.0%   |
| 78336 | 29 | 51.7%  | 29 | 51.7%  |
| 78358 | 2  | 50.0%  | 2  | 50.0%  |
| 78377 | 12 | 58.3%  | 12 | 58.3%  |
| 78382 | 79 | 36.7%  | 79 | 36.7%  |
| 78387 | 4  | 75.0%  | 4  | 75.0%  |
| 78393 | 16 | 50.0%  | 16 | 50.0%  |
| 78629 | 1  | 100.0% | 1  | 100.0% |
| 78932 | 2  | 50.0%  | 2  | 0.0%   |
| 78934 | 2  | 50.0%  | 2  | 50.0%  |
| 78962 | 1  | 0.0%   | 1  | 0.0%   |
| 79331 | 1  | 0.0%   | 1  | 0.0%   |

Table S8. TC and EC screening data collected through TWON programming in 8-9 Texas Gulf Coast counties between 2013-2017.

|                  | <b>TC</b> | <b>EC</b> |
|------------------|-----------|-----------|
| # samples        | 469       | 281       |
| % positive       | 19.6%     | 3.9%      |
| # clinics        | 9         | 8         |
| # samples/clinic | 18-188    | 18-70     |

TC: total coliform; EC: *E. coli*

Table S9. Linear regression model outputs

| Total coliform: 3 campaigns<br>(TC ~ Month)            |          |            |                                |         | <i>E. coli</i> : 3 campaigns<br>(EC ~ Month)           |          |            |                                |         |
|--------------------------------------------------------|----------|------------|--------------------------------|---------|--------------------------------------------------------|----------|------------|--------------------------------|---------|
|                                                        | Estimate | Std. Error | t-value                        | p-value |                                                        | Estimate | Std. Error | t-value                        | p-value |
| Intercept                                              | 0.286    | 0.055      | 5.23                           | <0.001  | Intercept                                              | 0.171    | 0.040      | 4.23                           | 0.024   |
| Month                                                  | -0.019   | 0.008      | -2.31                          | 0.046   | Month                                                  | -0.024   | 0.008      | -2.84                          | 0.066   |
| ---                                                    |          |            |                                |         | ---                                                    |          |            |                                |         |
| Residual standard error: 0.08 on 9 degrees of freedom  |          |            |                                |         | Residual standard error: 0.04 on 3 degrees of freedom  |          |            |                                |         |
| Multiple R <sup>2</sup> : 0.37                         |          |            | Adjusted R <sup>2</sup> : 0.30 |         | Multiple R <sup>2</sup> : 0.73                         |          |            | Adjusted R <sup>2</sup> : 0.64 |         |
| F-statistic: 5.34 on 1 and 9 DF                        |          |            | p-value: 0.046                 |         | F-statistic: 8.06 on 1 and 3 DF                        |          |            | p-value: 0.06                  |         |
| Total coliform: University campaign<br>(TC ~ Week)     |          |            |                                |         | <i>E. coli</i> : University campaign<br>(EC ~ Week)    |          |            |                                |         |
|                                                        | Estimate | Std. Error | t-value                        | p-value |                                                        | Estimate | Std. Error | t-value                        | p-value |
| Intercept                                              | 0.574    | 0.049      | 11.68                          | <0.001  | Intercept                                              | 0.192    | 0.02       | 9.53                           | <0.001  |
| Week                                                   | -0.027   | 0.006      | -4.42                          | 0.001   | Week                                                   | -0.015   | 0.00       | -6.09                          | <0.001  |
| ---                                                    |          |            |                                |         | ---                                                    |          |            |                                |         |
| Residual standard error: 0.09 on 10 degrees of freedom |          |            |                                |         | Residual standard error: 0.04 on 10 degrees of freedom |          |            |                                |         |
| Multiple R <sup>2</sup> : 0.66                         |          |            | Adjusted R <sup>2</sup> : 0.63 |         | Multiple R <sup>2</sup> : 0.79                         |          |            | Adjusted R <sup>2</sup> : 0.77 |         |
| F-statistic: 19.51 on 1 and 10 DF                      |          |            | p-value: 0.001                 |         | F-statistic: 37.14 on 1 and 10 DF                      |          |            | p-value: <0.001                |         |

Table S10. Distribution of coliform contamination by weeks since peak flooding among participants in University testing

| Week since peak flooding | n   | % TC positive | % EC positive |
|--------------------------|-----|---------------|---------------|
| 0                        | 46  | 58.7%         | 19.6%         |
| 1                        | 2   | 50.0%         | 0.0%          |
| 2                        | 102 | 43.1%         | 18.6%         |
| 3                        | 39  | 61.5%         | 17.9%         |
| 4                        | 198 | 42.4%         | 9.1%          |
| 5                        | 89  | 51.7%         | 14.6%         |
| 6                        | 58  | 29.3%         | 3.4%          |
| 7                        | 11  | 45.5%         | 0.0%          |
| 8                        | 54  | 46.3%         | 5.6%          |
| 9                        | 50  | 22.0%         | 2.0%          |
| 10                       | 70  | 34.3%         | 8.6%          |
| 11                       | 98  | 23.5%         | 2.0%          |
| 12                       | 82  | 29.3%         | 1.2%          |
| 13                       | 137 | 21.9%         | 0.7%          |
| 14                       | 8   | 50.0%         | 12.5%         |
| 15                       | 17  | 29.4%         | 5.9%          |
| 16                       | 0   | -             | -             |
| 17                       | 0   | -             | -             |
| 18                       | 0   | -             | -             |
| 19                       | 0   | -             | -             |
| 20                       | 1   | 0.0%          | 0.0%          |
| 21                       | 17  | 11.8%         | 5.9%          |
| 22                       | 45  | 33.3%         | 2.2%          |
| 23                       | 115 | 21.7%         | 0.0%          |
| 24                       | 11  | 0.0%          | 0.0%          |
| 25                       | 34  | 32.4%         | 5.9%          |
| 26                       | 47  | 34.0%         | 2.1%          |
| 27                       | 0   | -             | -             |
| 28                       | 1   | 0.0%          | 0.0%          |

TC: total coliform; EC: *E. coli*



Table S11. Odds ratio results from logistic regressions

| Variable                          | Total Coliform Detection |             |             |         | <i>E. coli</i> Detection |             |             |         |
|-----------------------------------|--------------------------|-------------|-------------|---------|--------------------------|-------------|-------------|---------|
|                                   | Odds Ratio               | Lower Bound | Upper Bound | p-value | Odds Ratio               | Lower Bound | Upper Bound | p-value |
| Survey Data Model Output          |                          |             |             |         |                          |             |             |         |
| Submerged wellhead                | <b>2.17</b>              | 1.50        | 3.15        | <0.001  | <b>8.53</b>              | 4.25        | 19.06       | <0.001  |
| Within 100 m of flood pixel       | <b>1.68</b>              | 1.04        | 2.72        | 0.03    | <b>2.97</b>              | 1.61        | 5.31        | <0.001  |
| Within 250 m of flood pixel       | 1.42                     | 0.97        | 2.10        | 0.07    | <b>2.05</b>              | 1.18        | 3.50        | 0.01    |
| Rural area                        | 0.89                     | 0.63        | 1.24        | 0.48    | <b>0.58</b>              | 0.35        | 0.97        | 0.04    |
| Resumed water use                 | 0.93                     | 0.86        | 1.00        | 0.05    | <b>0.78</b>              | 0.68        | 0.89        | 0.00    |
| Switched to bottled water         | 1.39                     | 0.95        | 2.05        | 0.09    | <b>2.66</b>              | 1.31        | 6.15        | 0.01    |
| Water unsafe for drinking         | <b>1.14</b>              | 1.02        | 1.27        | 0.02    | <b>1.43</b>              | 1.19        | 1.75        | <0.001  |
| Water unsafe for cooking          | <b>1.14</b>              | 1.02        | 1.27        | 0.02    | <b>1.39</b>              | 1.18        | 1.67        | <0.001  |
| Not using for cooking             | <b>1.43</b>              | 1.02        | 1.96        | 0.04    | <b>2.56</b>              | 1.52        | 4.55        | <0.001  |
| Water unsafe for bathing          | <b>1.14</b>              | 1.01        | 1.27        | 0.04    | <b>1.37</b>              | 1.15        | 1.64        | <0.001  |
| Not using for bathing             | 1.11                     | 0.76        | 1.61        | 0.58    | <b>2.27</b>              | 1.32        | 3.85        | <0.01   |
| Not using for laundry             | 1.19                     | 0.83        | 1.69        | 0.35    | <b>2.27</b>              | 1.37        | 3.85        | <0.01   |
| Water Chemistry Data Model Output |                          |             |             |         |                          |             |             |         |
| Cobalt                            | 1.37                     | 0.97        | 0.11        | 2.13    | <b>1.55</b>              | 1.10        | 2.24        | 0.01    |
| Arsenic                           | 1.02                     | 0.97        | 0.43        | 1.07    | <b>1.11</b>              | 1.05        | 1.20        | 0.00    |
| Uranium                           | 1.02                     | 0.99        | 0.35        | 1.08    | <b>1.07</b>              | 1.01        | 1.15        | 0.05    |

**Bold text** indicates significant odds ratio value

Table S12. Well disinfection rates based on inundation proximity

| Proximity to inundation | Within proximity |       |                 |       | Not within proximity |       |                 |       |
|-------------------------|------------------|-------|-----------------|-------|----------------------|-------|-----------------|-------|
|                         | Chlorinated      |       | Not chlorinated |       | Chlorinated          |       | Not chlorinated |       |
|                         | n                | %     | n               | %     | n                    | %     | n               | %     |
| 100 m                   | 37               | 46.8% | 42              | 53.2% | 157                  | 20.0% | 628             | 80.0% |
| 250 m                   | 64               | 41.8% | 89              | 58.2% | 130                  | 18.3% | 581             | 81.7% |
| 500 m                   | 91               | 31.4% | 199             | 68.6% | 103                  | 17.9% | 471             | 82.1% |
| 1000 m                  | 116              | 25.7% | 335             | 74.3% | 78                   | 18.9% | 335             | 81.1% |

## GEOSPATIAL MODELING DATA

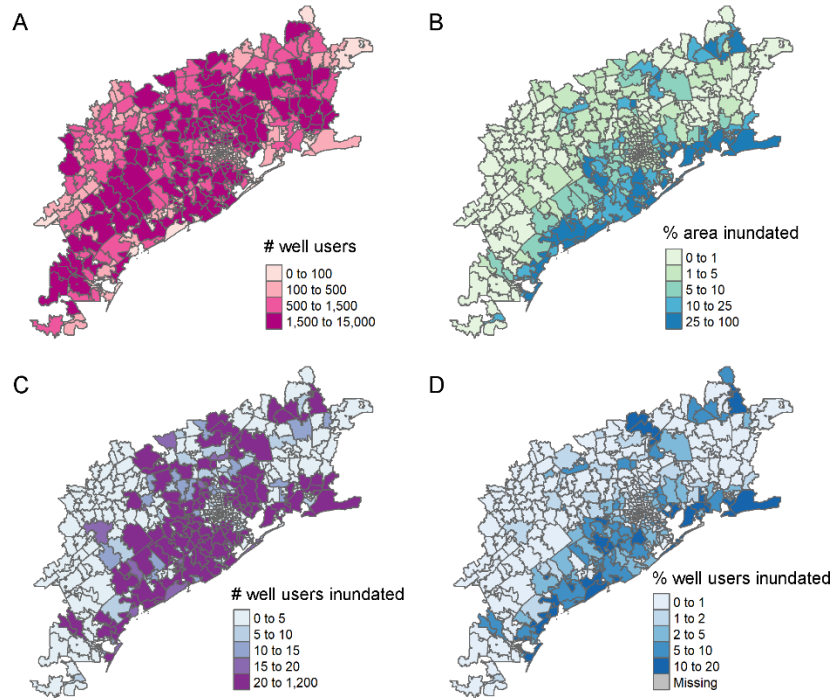

## CITIZEN SCIENCE SAMPLING DATA

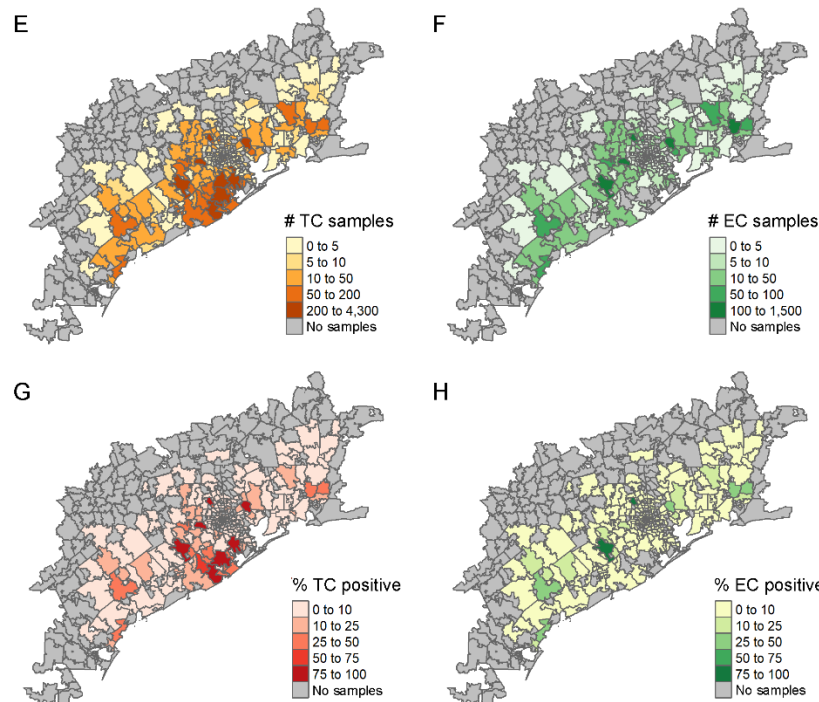

Figure S1. Spatial extent of flood impact on well users and associated contamination rates by zip code for (A) Total number of well users; (B) Percent of county flooded; (C) Total number of well users flooded; (D) Percent of well users flooded; (E) Total number of total coliform samples; (F) Total number of *E. coli* samples; (G) Percent of total coliform positive samples; and (H) Percent of *E. coli* positive samples. Well locations were derived from USGS well dataset<sup>23</sup> and inundation from the inundation dataset.<sup>24</sup> Samples reported were collected during the University and health department campaigns.

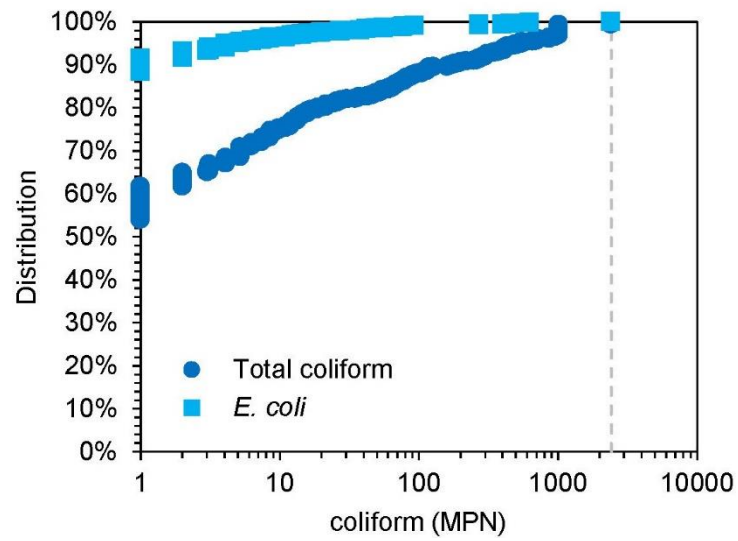

Figure S2. Cumulative distribution plot of total coliform and *E. coli* in Round 1. Dashed gray line indicates too numerous to count (TNTC; >2419.6 MPN); MPN: most probable number; n=602

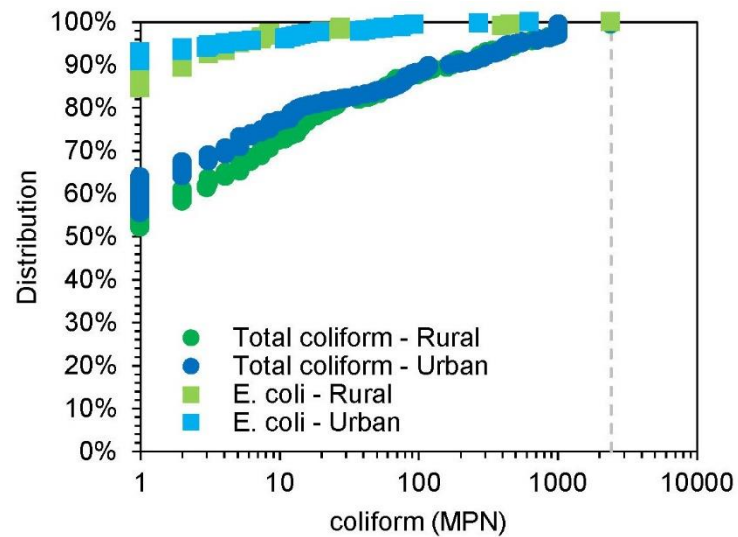

Figure S3. Cumulative distribution plot of total coliform and *E. coli* in Round 1 by rural and urban counties. Dashed gray line indicates too numerous to count (TNTC; >2419.6 MPN); MPN: most probable number; N=602,  $n_{\text{rural}} = 228$ , and  $n_{\text{urban}}=374$

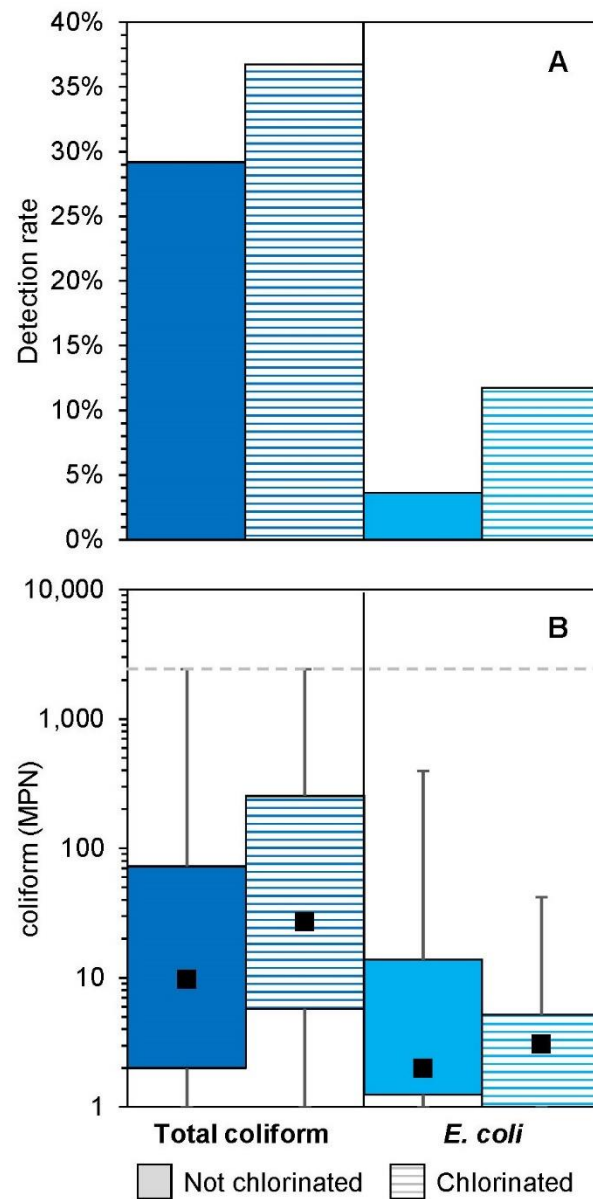

Figure S4. Total coliform and *E. coli* levels in chlorinated and non-chlorinated well water as (A) percent detected and (B) bacteria concentrations. Black square: median MPN value. Gray dashed line: too numerous to count (>2419.6 MPN).

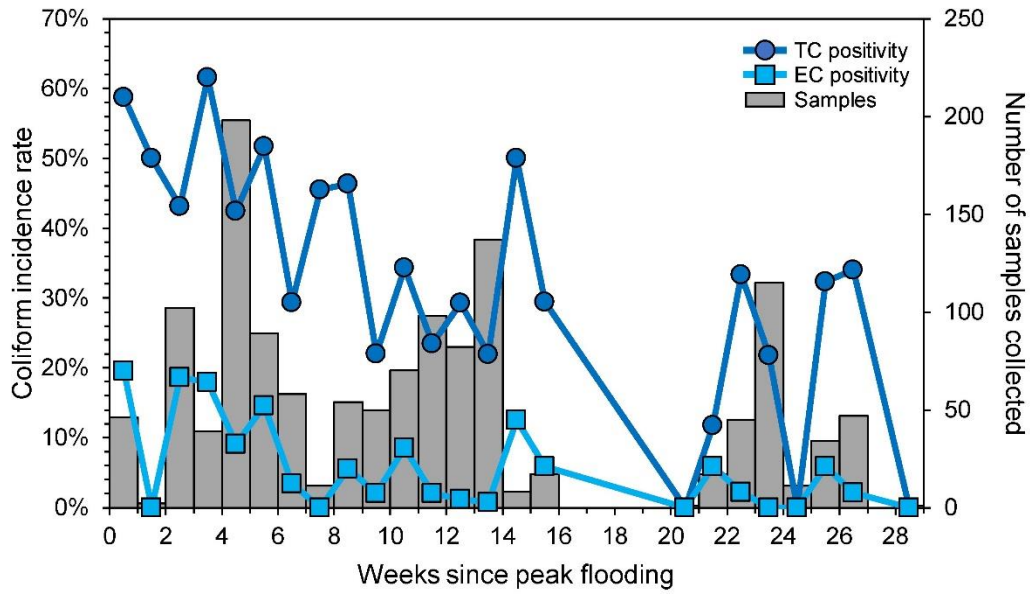

Figure S5. Number of samples and microbial contamination rates by weeks since peak flooding for Rounds 1 and 2 of the University testing through 28 weeks. TC: total coliform; EC: *E. coli*
